# Supplementary material for: Insights into the Value of Lyso-Gb1 as a Predictive Biomarker in Treatment-Naïve Patients with Gaucher Disease Type 1 in the LYSO-PROOF Study
Source: MDPI journal article supplement (doi:10.3390/diagnostics13172812), 2023-08-30
Supplement: s1 [file s1]

## Supplementary Information

### Insights into the dynamics of lyso-Gb1 accumulation in untreated patients with Gaucher disease type 1 in LYSO-PROOF study

A comprehensive list of all detected *GBA1* variants in the LYSO-PROOF study is provided in Table S1.

**Table S1.** Individual variants/alleles

| No. | cDNA             | allele                     | n   | frequency in % |
|-----|------------------|----------------------------|-----|----------------|
| 1   | c.1226A>G        | p.(Asn409Ser)              | 175 | 54.7           |
| 2   | c.1448T>C        | p.(Leu483Pro)              | 21  | 6.6            |
| 3   | c.1603C>T        | p.(Arg535Cys)              | 10  | 3.1            |
| 4   | c.1342G>C        | p.(Asp448His)              | 8   | 2.5            |
| 5   | c.259C>T         | p.(Arg87Trp)               | 8   | 2.5            |
| 6   | c.1171G>A        | p.(Val391Met)              | 8   | 2.5            |
| 7   | c.1184C>T        | p.(Ser395Phe)              | 8   | 2.5            |
| 8   | c.1060G>A        | p.(Asp354Asn)              | 6   | 1.9            |
| 9   | c.479T>C         | p.(Val160Ala)              | 6   | 1.9            |
| 10  | c.667T>C         | p.(Trp223Arg)              | 5   | 1.6            |
| 11  | c.1177C>G        | p.(Leu393Val)              | 4   | 1.3            |
| 12  | c.1297G>T        | p.(Val433Leu)              | 4   | 1.3            |
| 13  | c.352A>G         | p.(Lys118Glu)              | 4   | 1.3            |
| 14  | c.84dupG         | p.(Leu29Alafs*18)          | 4   | 1.3            |
| 15  | c.1193G>A        | p.(Arg398Gln)              | 3   | 0.9            |
| 16  | c.371T>C         | p.(Met124Thr)              | 3   | 0.9            |
| 17  | c.1111C>A        | p.(Pro371Thr)              | 2   | 0.6            |
| 18  | c.1304A>C        | p.(Asn435Thr)              | 2   | 0.6            |
| 19  | c.475C>T         | p.(Arg159Trp)              | 2   | 0.6            |
| 20  | c.1296G>T        | p.(Trp432Cys)              | 2   | 0.6            |
| 21  | c.1300C>T        | p.(Arg434Cys)              | 2   | 0.6            |
| 22  | c.1316G>C        | p.(Ser439Thr)              | 2   | 0.6            |
| 23  | c.1331A>T        | p.(Asp444Val)              | 2   | 0.6            |
| 24  | c.1224G>A        | p.(=)                      | 2   | 0.6            |
| 25  | c.1574G>A        | p.(Gly525Asp)              | 2   | 0.6            |
| 26  | c.1604G>A        | p.(Arg535His)              | 2   | 0.6            |
| 27  | c.253G>A         | p.(Gly85Arg)               | 2   | 0.6            |
| 28  | c.252_257dup     | p.(Gly85_Arg86dup)         | 2   | 0.6            |
| 29  | c.43_66del24bp   | p.(Leu15_Ala22del)         | 2   | 0.6            |
| 30  | c.786C>G         | p.(Phe266Leu)              | 2   | 0.6            |
| 31  | c.847T>C         | p.(Tyr283His)              | 2   | 0.6            |
| 32  | c.470_482delinsA | p.(Ile157_Pro161delinsAsn) | 1   | 0.3            |
| 33  | c.485T>C         | p.(Met162Thr)              | 1   | 0.3            |
| 34  | c.496G>T         | p.(Asp166Tyr)              | 1   | 0.3            |
| 35  | c.721G>A         | p.(Gly241Arg)              | 1   | 0.3            |
| 36  | c.849C>A         | p.(Tyr283*)                | 1   | 0.3            |
| 37  | c.544C>T         | p.(Gln182*)                | 1   | 0.3            |

|       |              |               |     |     |
|-------|--------------|---------------|-----|-----|
| 38    | c.971G>A     | p.(Arg324His) | 1   | 0.3 |
| 39    | c.222_224del | p.(Thr75del)  | 1   | 0.3 |
| 40    | c.254G>A     | p.(Gly85Glu)  | 1   | 0.3 |
| 41    | c.653G>A     | p.(Trp218*)   | 1   | 0.3 |
| 42    | c.990G>A     | p.(Trp330*)   | 1   | 0.3 |
| 43    | c.492C>G     | p.(Ser164Arg) | 1   | 0.3 |
| 44    | c.680A>G     | p.(Asn227Ser) | 1   | 0.3 |
| total |              |               | 320 | 100 |

A comprehensive list of all *GBA1* genotypes identified in the LYSO-PROOF study is provided in Table S2 including references for classification.

**Table S2.** Genotypes (at cDNA and protein level)

| No. | genotype                                                              | n  | frequency in % | classification and reference |
|-----|-----------------------------------------------------------------------|----|----------------|------------------------------|
| 1   | c.1226A>G p.(Asn409Ser) homozygous                                    | 66 | 41.2           | 1 <sup>12</sup>              |
| 2   | c.1226A>G p.(Asn409Ser) / c.1448T>C p.(Leu483Pro)                     | 13 | 8.1            | 1 <sup>12</sup>              |
| 3   | c.1226A>G p.(Asn409Ser) / c.1342G>C p.(Asp448His)                     | 6  | 3.8            | 1 <sup>12</sup>              |
| 4   | c.1603C>T p.(Arg535Cys) homozygous                                    | 5  | 3.1            | -                            |
| 5   | c.1171G>A p.(Val391Met) homozygous                                    | 4  | 2.5            | -                            |
| 6   | c.1226A>G p.(Asn409Ser) / c.1297G>T p.(Val433Leu)                     | 4  | 2.5            | 1 <sup>12</sup>              |
| 7   | c.1226A>G p.(Asn409Ser) / c.667T>C p.(Trp223Arg)                      | 4  | 2.5            | 1 <sup>12</sup>              |
| 8   | c.1060G>A p.(Asp354Asn) homozygous                                    | 3  | 1.9            | -                            |
| 9   | c.1184C>T p.(Ser395Phe) homozygous                                    | 3  | 1.9            | -                            |
| 10  | c.1226A>G p.(Asn409Ser) / c.84dupG p.(Leu29Alafs*18)                  | 3  | 1.9            | 1 <sup>12</sup>              |
| 11  | c.1448T>C p.(Leu483Pro) / c.259C>T p.(Arg87Trp)                       | 3  | 1.9            | -                            |
| 12  | c.479T>C p.(Val160Ala) homozygous                                     | 3  | 1.9            | -                            |
| 13  | c.1177C>G p.(Leu393Val) homozygous                                    | 2  | 1.3            | 1 ClinVar                    |
| 14  | c.1226A>G p.(Asn409Ser) / c.1304A>C p.(Asn435Thr)                     | 2  | 1.3            | 1 <sup>12</sup>              |
| 15  | c.1226A>G p.(Asn409Ser) / c.475C>T p.(Arg159Trp)                      | 2  | 1.3            | 1 <sup>12</sup>              |
| 16  | c.1300C>T p.(Arg434Cys) / c.1342G>C p.(Asp448His)                     | 2  | 1.3            | -                            |
| 17  | c.1448T>C p.(Leu483Pro) / c.1224G>A p.(=)                             | 2  | 1.3            | -                            |
| 18  | c.259C>T p.(Arg87Trp) homozygous                                      | 2  | 1.3            | 1 ClinVar                    |
| 19  | c.352A>G p.(Lys118Glu) homozygous                                     | 2  | 1.3            | -                            |
| 20  | c.1111C>A p.(Pro371Thr) homozygous                                    | 1  | 0.3            | -                            |
| 21  | c.1184C>T p.(Ser395Phe) / c.1226A>G p.(Asn409Ser)                     | 1  | 0.3            | 1 <sup>12</sup>              |
| 22  | c.1184C>T p.(Ser395Phe) / c.1448T>C p.(Leu483Pro)                     | 1  | 0.3            | -                            |
| 23  | c.1193G>A p.(Arg398Gln) homozygous                                    | 1  | 0.3            | 1 <sup>3</sup>               |
| 24  | c.1193G>A p.(Arg398Gln) / c.1448T>C p.(Leu483Pro)                     | 1  | 0.3            | -                            |
| 25  | c.1226A>G p.(Asn409Ser) / c.371T>C p.(Met124Thr)                      | 1  | 0.3            | 1 <sup>12</sup>              |
| 26  | c.1226A>G p.(Asn409Ser) / c.470_482delinsA p.(Ile157_Pro161delinsAsn) | 1  | 0.3            | 1 <sup>12</sup>              |
| 27  | c.1226A>G p.(Asn409Ser) / c.485T>C p.(Met162Thr)                      | 1  | 0.3            | 1 <sup>12</sup>              |
| 28  | c.1226A>G p.(Asn409Ser) / c.496G>T p.(Asp166Tyr)                      | 1  | 0.3            | 1 <sup>12</sup>              |

|       |                                                      |     |     |                 |
|-------|------------------------------------------------------|-----|-----|-----------------|
| 29    | c.1226A>G p.(Asn409Ser) / c.721G>A p.(Gly241Arg)     | 1   | 0.3 | 1 <sup>12</sup> |
| 30    | c.1226A>G p.(Asn409Ser) / c.849C>A p.(Tyr283*)       | 1   | 0.3 | 1 <sup>12</sup> |
| 31    | c.1226A>G p.(Asn409Ser) / c.544C>T p.(Gln182*)       | 1   | 0.3 | 1 <sup>12</sup> |
| 32    | c.1226A>G p.(Asn409Ser) / c.971G>A p.(Arg324His)     | 1   | 0.3 | 1 <sup>12</sup> |
| 33    | c.1296G>T p.(Trp432Cys) homozygous                   | 1   | 0.3 | -               |
| 34    | c.1316G>C p.(Ser439Thr) homozygous                   | 1   | 0.3 | -               |
| 35    | c.1331A>T p.(Asp444Val) homozygous                   | 1   | 0.3 | -               |
| 36    | c.1448T>C p.(Leu483Pro) / c.222_224del p.(Thr75del)  | 1   | 0.3 | -               |
| 37    | c.1574G>A p.(Gly525Asp) homozygous                   | 1   | 0.3 | -               |
| 38    | c.1604G>A p.(Arg535His) / c.84dupG p.(Leu29Alafs*18) | 1   | 0.3 | -               |
| 39    | c.1604G>A p.(Arg535His) / c.990G>A p.(Trp330*)       | 1   | 0.3 | -               |
| 40    | c.252_257dup p.(Gly85_Arg86dup) homozygous           | 1   | 0.3 | -               |
| 41    | c.253G>A p.(Gly85Arg) homozygous                     | 1   | 0.3 | -               |
| 42    | c.254G>A p.(Gly85Glu) / c.492C>G p.(Ser164Arg)       | 1   | 0.3 | -               |
| 43    | c.259C>T p.(Arg87Trp) / c.653G>A p.(Trp218*)         | 1   | 0.3 | -               |
| 44    | c.371T>C p.(Met124Thr) homozygous                    | 1   | 0.3 | -               |
| 45    | c.43_66del24bp p.(Leu15_Alal22del) homozygous        | 1   | 0.3 | -               |
| 46    | c.667T>C p.(Trp223Arg) / c.680A>G p.(Asn227Ser)      | 1   | 0.3 | -               |
| 47    | c.786C>G p.(Phe266Leu) homozygous                    | 1   | 0.3 | -               |
| 48    | c.847T>C p.(Tyr283His) homozygous                    | 1   | 0.3 | -               |
| total |                                                      | 160 | 100 |                 |

#### References:

1. Grabowski GA, Zimran A, Ida H. Gaucher disease types 1 and 3: Phenotypic characterization of large populations from the ICGG Gaucher Registry. *Am J Hematol* 2015;90 Suppl 1:S12-8. doi: 10.1002/ajh.24063 [published Online First: 2015/06/23]
2. Pastores GM, Hughes DA. Gaucher Disease. In: Adam MP, Mirzaa GM, Pagon RA, et al., eds. *GeneReviews*((R)). Seattle (WA)1993.
3. Mozafari H, Tghikhani M, Rahimi Z, et al. Analysis of glucocerebrosidase (GBA) gene mutations in Iranian patients with Gaucher disease. *Iran J Child Neurol* 2021;15(3):139-66. doi: 10.22037/ijcn.v15i4.23834 [published Online First: 2021/07/21]

A comprehensive list regarding the frequency of the indicated clinical symptoms for all, type 1, mild type 1, severe type 1, and not classified patients in the LYSO-PROOF study is provided in Table S3.

**Table S3.** Frequency of presence of indicated clinical symptoms

| Clinical symptoms | Condition present        |                          |                          |                          |                          |
|-------------------|--------------------------|--------------------------|--------------------------|--------------------------|--------------------------|
|                   | All patients<br>N = 160  | Type 1<br>N = 114        | Mild type 1<br>N = 66    | Severe Type 1<br>N = 48  | Not classified<br>N = 46 |
|                   | (%)<br>N present/N total |
| Splenomegaly      | (75.0) 117/156           | (68.8) 77/112            | (54.5) 36/66             | (62.1) 41/46             | (90.9) 40/44             |
| Thrombocytopenia  | (74.4) 116/156           | (74.1) 83/112            | (68.2) 45/66             | (82.6) 38/46             | (75.0) 33/44             |
| Hepatomegaly      | (62.4) 98/157            | (53.6) 60/112            | (39.4) 26/66             | (73.9) 34/46             | (84.4) 38/45             |

|                                      |               |               |              |              |              |
|--------------------------------------|---------------|---------------|--------------|--------------|--------------|
| Anemia                               | (56.3) 89/158 | (53.1) 60/113 | (39.4) 26/66 | (72.3) 34/47 | (64.4) 29/45 |
| Gaucher cells in Bone Marrow         | (75.8) 75/99  | (71.4) 45/63  | (59.4) 19/32 | (83.9) 26/31 | (83.3) 30/36 |
| Erlenmeyer flask' deformity of femur | (28.7) 43/150 | (32.4) 34/105 | (21.5) 14/65 | (50.0) 20/40 | (20.0) 9/45  |
| Bone pain                            | (24.7) 39/158 | (29.2) 33/113 | (25.8) 17/66 | (34.0) 16/47 | (13.3) 6/45  |
| Pancytopenia                         | (20.5) 32/156 | (18.8) 21/112 | (16.7) 11/66 | (21.7) 10/46 | (25.0) 11/44 |
| Dyspnea                              | (6.9) 11/158  | (5.3) 6/113   | (4.5) 3/66   | (6.4) 3/47   | (11.1) 5/45  |
| Osteonecrosis                        | (10.8) 16/148 | (15.2) 16/105 | (9.2) 6/65   | (25.0) 10/40 | (0.0) 0/43   |
| Bone crises                          | (8.4) 13/154  | (9.1) 10/110  | (4.6) 3/65   | (15.6) 7/45  | (6.8) 3/44   |
| Osteolytic lesions                   | (6.1) 9/147   | (7.7) 8/104   | (7.8) 5/64   | (7.5) 3/40   | (2.3) 1/43   |
| Avascular necrosis of femoral head   | (6.5) 10/153  | (8.3) 9/109   | (3.1) 2/65   | (15.9) 7/44  | (2.3) 1/44   |
| Pathologic fractures                 | (5.8) 9/156   | (7.2) 8/111   | (9.2) 6/65   | (4.3) 2/46   | (2.2) 1/45   |
| Seizures                             | (1.9) 3/157   | (0.0) 0/112   | (0.0) 0/66   | (0.0) 0/46   | (6.7) 3/45   |
| Vertebral compression                | (2.7) 4/148   | (3.8) 4/104   | (1.6) 1/64   | (7.5) 3/40   | (0.0) 0/44   |
| Interstitial lung disease            | (0.7) 1/152   | (0.0) 0/110   | (0.0) 0/64   | (0.0) 0/46   | (2.4) 1/42   |
| Monoclonal gammopathy                | (1.3) 2/149   | (1.9) 2/105   | (1.5) 1/65   | (2.4) 1/41   | (0.0) 0/44   |
| Pulmonary hypertension               | 0.7) 1/148    | (1.0) 1/105   | (1.5) 1/65   | (0.0) 0/41   | (0.0) 0/43   |
| Corneal pathology                    | (1.4) 2/144   | (1.0) 1/101   | (0.0) 0/63   | (2.6) 1/38   | (2.3) 1/43   |
| Multiple myeloma                     | (0.0) 0/157   | (0.0) 0/113   | (0.0) 0/66   | (0.0) 0/47   | (0.0) 0/44   |

The following collaborators contributed with the participants recruitment and data collection to the LYSO-PROOF study (Table S4). Only collaborators that are not listed as co-authors are listed in Table S4.

**Table S4: LYSO-PROOF Study Group**

| PI and Institution |                                                                                                                                                                                      |    |                                                                                                                                                                                                                                        |
|--------------------|--------------------------------------------------------------------------------------------------------------------------------------------------------------------------------------|----|----------------------------------------------------------------------------------------------------------------------------------------------------------------------------------------------------------------------------------------|
| 1                  | <b>Prof. Dr. Dimitrios Zafeiriou</b><br>Aristotle University of Thessaloniki, Ippokration General Hospital, Pediatrics Department<br>Konstantinoupoleos, 54642, Thessaloniki, Greece | 10 | <b>Dr. Hanna Rosenbaum</b><br>Head of Hematology clinic & Hematology Day care unit<br>Head of Gaucher center<br>The center for consultant medicine Clalit services<br>Nazareth towers, Nazareth, Israel                                |
| 2                  | <b>Prof. Dr. Nezha Mouane</b><br>Paediatrics' Gastroenterology Nutrition Department, Academic Children Hospital Ibn Sina<br>Mohammed V University, Rabat- Morocco                    | 11 | <b>Prof. Dr. Fadia Rahal</b><br>Rheumatologist & Assistant Professor in Academic Medicine<br>Department of Rheumatology. Ben Aknoun Hospital<br>Academic Department: Faculty of Medicine. Algiers 1 University. Algiers 16306, Algeria |
| 3                  | <b>Dr. Radha Rama Devi</b><br>Prasad Research Foundation, 3-38-93, Plot No.7, Rukmini Devi Colony Annexe, West Marredpally Secunderabad -500026 Telangana, Hyderabad, India          | 12 | <b>Dr. Pilar Giraldo</b><br>Unidad de Investigación Traslacional, Hospital Universitario Miguel Servet, FETEEG                                                                                                                         |

|   |                                                                                                                                                           |    |                                                                                                                                                                                                  |
|---|-----------------------------------------------------------------------------------------------------------------------------------------------------------|----|--------------------------------------------------------------------------------------------------------------------------------------------------------------------------------------------------|
|   |                                                                                                                                                           |    | Pta Baja Edificio General, Pº Isabel La Católica 1-3, 50009 Zaragosa, Spain                                                                                                                      |
| 4 | <b>Prof. Dr. Sheela Nampoothiri</b><br>Amrita Institute of Medical Sciences, Pediatric Genetics Department<br>- AIMS Ponekkara PO, Cochin 682041, India   | 13 | <b>Dr. Souhila Melzi</b><br>CHU Bab El Oued, Pediatrics Department<br>Boulevard Said Touati, Bab El Oued, 16008 Algier, Algeria                                                                  |
| 5 | <b>Dr. Meenakshi Bhat</b><br>Centre for Human Genetics, Centre for Human Genetics<br>Bangalore 560100, India                                              | 14 | <b>Prof. Dr. Abdelkrim Berrah</b><br><b>Dr. Karima Daghor Abbaci</b><br>CHU Bab El Oued, Internal Medicine, Univeristy of Algiers 1<br>Boulevard Said Touati, Bab El Oued, 16008 Algier, Algeria |
| 6 | <b>Prof. Dr. Paskal Cullufi</b><br>University Hospital Center Mother Teresa, Pediatrics Department<br>Rruga e Dibrës 372, Tirana, 10001, Albania          | 15 | <b>Dr. Abdelmadjid Benmansour (†) *(deceased)</b><br>CHU Oran Centre Hospitalier et Universitaire d'Oran, Pediatrics Department<br>35 rue de Mostaganem, 31000 Oran, Algeria                     |
| 7 | <b>Dr. Xavier Solanich, MD, PhD</b><br>Internal Medicine Department, Hospital Universitari de Bellvitge<br>IDIBELL, Barcelona, Spain                      | 16 | <b>Dr. Gustavo Adolfo Giraldo Ospina</b><br><b>Dr. Pilar Guatibonza Moreno</b><br>ACMGen, Asociacion Colombiana de Médicos Genetistas<br>- Bogotá, Colombia                                      |
| 8 | <b>Prof. Dr.Ekram Fateen</b><br>Biochemical Genetics Department<br>National Research Centre, Cairo Egypt                                                  | 17 | <b>Prof. Dr. Sondes Hadiji Mseddi</b><br>Hospital Hedi Chaker, Route El Ain<br>3000, Sfax, Tunisia                                                                                               |
| 9 | <b>Prof. Dr. Elena Lukina</b><br>National Medical Research Center for Hematology, Orphan Diseases Department 4<br>Novy Zykovsky pr.125167, Moscow, Russia | 18 | <b>Prof. Dr. Maciej Machaczka</b><br>Karolinska University, Hospital Huddinge<br>Hematology Center, M54, SE-141 86, Stockholm, Sweden                                                            |
